# Supplementary material
Source: PubMed Central journal article supplement (PMC1087908)

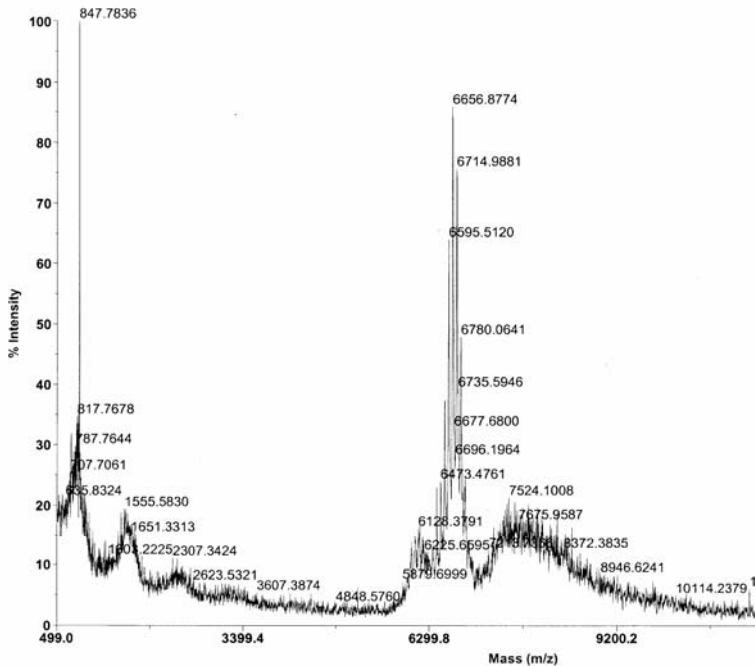

Supplement: pnas_102_17_5944__1.pdf [file pnas_102_17_5944__1.pdf]

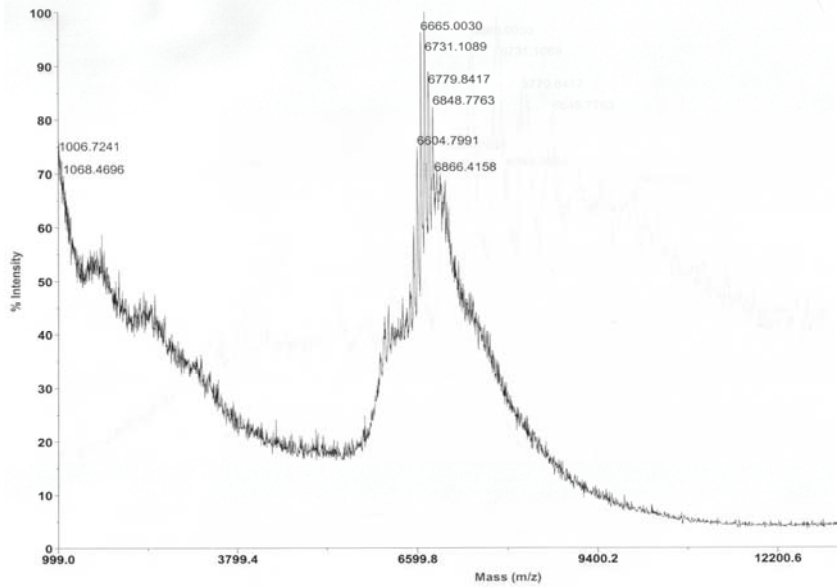

Supplement: pnas_102_17_5944__2.pdf [file pnas_102_17_5944__2.pdf]
